# Supplementary material
Source: publisher site journal article supplement (https://www.dovepress.com/article/313113)
Supplement: Supplementary file 1 [file get_supplementary_file.php]

**Supplementary table 1 univariant cox regression and LASSO coefficients of 72 clinical features**

|  | P | HR | 95% CI | LASSO coefficients |
| --- | --- | --- | --- | --- |
| Gender | 0.487 | 1.309 | 0.613-2.794 | —— |
| Age | 0.702 | 0.994 | 0.964-1.025 | -0.002289203 |
| Smoke | 0.639 | 1.199 | 0.561-2.560 | —— |
| Drink | 0.201 | 1.681 | 0.759-3.723 | —— |
| High blood pressure | 0.636 | 0.749 | 0.226-2.483 | —— |
| Diabetes | 0.358 | 0.392 | 0.053-2.890 | —— |
| History of families | 0.298 | 0.57 | 0.198-1.643 | —— |
| Clinical stage | 0.55 | 1.317 | 0.534-3.249 | 0.015039527 |
| Image T stage | 0.319 | 1.424 | 0.711-2.853 | —— |
| Ultra T stage | 0.983 | 1.005 | 0.642-1.572 | —— |
| Image N stage | 0.483 | 0.758 | 0.350-1.643 | —— |
| Ultra N stage | 0.643 | 1.051 | 0.852-1.296 | —— |
| Neo-CRT | 0.422 | 0.892 | 0.676-1.179 | -0.061329596 |
| 5FU courses | 0.379 | 1.168 | 0.826-1.651 | —— |
| Group of 5FU courses | 0.374 | 0.709 | 0.332-1.514 | —— |
| Radiation Tech | 0.954 | 0.968 | 0.316-2.963 | —— |
| Radiation dose | 0.845 | 0.974 | 0.751-1.264 | —— |
| Radiation fractions | 0.952 | 1.017 | 0.579-1.787 | —— |
| Location of tumor | 0.219 | 0.817 | 0.591-1.128 | —— |
| Tumor size | 0.025 | 0.777 | 0.623-0.968 | -0.032920514 |
| Distance to anal verge | 0.089 | 1.099 | 0.986-1.225 | 0.035149918 |
| Group of distance to anal verge | 0.265 | 1.294 | 0.823-2.036 | —— |
| Distance to anal verge after IR | 0.15 | 0.904 | 0.788-1.037 | -0.033504218 |
| Group of intestinal occupation | 0.539 | 0.636 | 0.150-2.691 | —— |
| Intestinal occupation | 0.993 | 0.998 | 0.636-1.567 | —— |
| MRF | 0.47 | 1.315 | 0.626-2.764 | —— |
| EMVI | 0.612 | 1.222 | 0.562-2.651 | —— |
| EMVI score | 0.98 | 1.004 | 0.722-1.397 | —— |
| Surgery | 0.097 | 1.903 | 0.891-4.063 | —— |
| Risk category | 0.484 | 1.133 | 0.798-1.609 | —— |
| Surgical approach | 0.728 | 0.873 | 0.47-1.872 | —— |
| Colostomy | 0.522 | 1.282 | 0.599-2.742 | —— |
| Colostomy return | 0.298 | 0.597 | 0.226-1.578 | —— |
| Ascites | 0.3 | 0.348 | 0.047-2.565 | —— |
| Ascites volume | 0.324 | 0.959 | 0.883-1.042 | —— |
| Blood loss | 0.442 | 0.789 | 0.432-1.443 | —— |
| Blood loss volume | 0.778 | 1.001 | 0.996-1.005 | —— |
| Difficulty in surgery | 0.738 | 1.227 | 0.370-4.064 | —— |
| Complications within 30 days | 0.788 | 0.821 | 0.195-3.458 | —— |
| Complications for surgery | 0.587 | 0.672 | 0.259-2.829 | —— |
| Pre-treatment CA19-9 | 0.159 | 1.025 | 0.990-1.062 | —— |
| Group of pretreatment CEA | 0.066 | 1.568 | 0.970-2.534 | 0.147287958 |
| Pre-treatment CEA | <0.000 | 1.017 | 1.009-1.026 | 0.013649976 |
| Preoperative CA19-9 | 0.178 | 1.024 | 0.989-1.060 | —— |
| Preoperative CEA | 0.834 | 1.017 | 0.868-1.192 | 0.006084395 |
| CEA after surgery | 0.385 | 1.035 | 0.958-1.118 | —— |
| CA19-9 after surgery | 0.572 | 1.012 | 0.972-1.053 | —— |
| NAR of DFS | 0.067 | 0.373 | 0.130-1.071 | -0.033862886 |
| NAR of MFS | 0.801 | 0.923 | 0.494-1.723 | —— |
| Group of NAR score | 0.484 | 0.815 | 0.460-1.445 | —— |
| NAR score | 0.38 | 1.051 | 0.941-1.174 | —— |
| Cross peritoneum fold line | 0.477 | 0.756 | 0.349-1.637 | —— |
| Invade peritoneum fold line | 0.524 | 1.412 | 0.489-4.073 | —— |
| Lateral lymph | 0.778 | 1.125 | 0.496-2.555 | —— |
| Number of lateral lymph | 0.833 | 0.965 | 0.696-1.339 | —— |
| Para-intestinal lymph nodes | 0.491 | 0.952 | 0.829-1.094 | —— |
| Group of para-intestinal lymph nodes | 0.815 | 1.097 | 0.506-2.379 | —— |
| Medial lymph nodes | 0.624 | 0.733 | 0.212-2.538 | —— |
| Central lymph nodes | 0.791 | 0.366 | 0.000-611.510 | —— |
| Internal iliac lymph nodes(left) | 0.416 | 0.673 | 0.259-1.748 | —— |
| Internal iliac lymph nodes(right) | 0.114 | 1.781 | 0.871-3.642 | —— |
| External iliac lymph nodes(left) | 0.694 | 0.115 | 0.000-5512.835 | —— |
| External iliac lymph nodes(right) | 0.824 | 0.049 | 0.000-1.716 | —— |
| Common iliac lymph nodes(left) | 0.619 | 0.116 | 0.000-570.493 | —— |
| Common iliac lymph nodes(right) | 0.775 | 0.049 | 0.000-476 | —— |
| Obturator lymph nodes(right) | 0.756 | 0.776 | 0.156-3.856 | —— |
| Obturator lymph nodes(right) | 0.482 | 0.079 | 0.000-93.856 | —— |
| Inguinal lymph nodes(left) | 0.536 | 1.371 | 0.505-3.717 | —— |
| Inguinal lymph nodes(right) | 0.615 | 1.27 | 0.501-3.220 | —— |
| Presacral lymph nodes | 0.995 | 0.999 | 0.683-1.461 | —— |
| Invasion distance | 0.78 | 0.958 | 0.708-1.296 | —— |
| Group of invasion distance | 0.477 | 0.692 | 0.251-1.910 | —— |


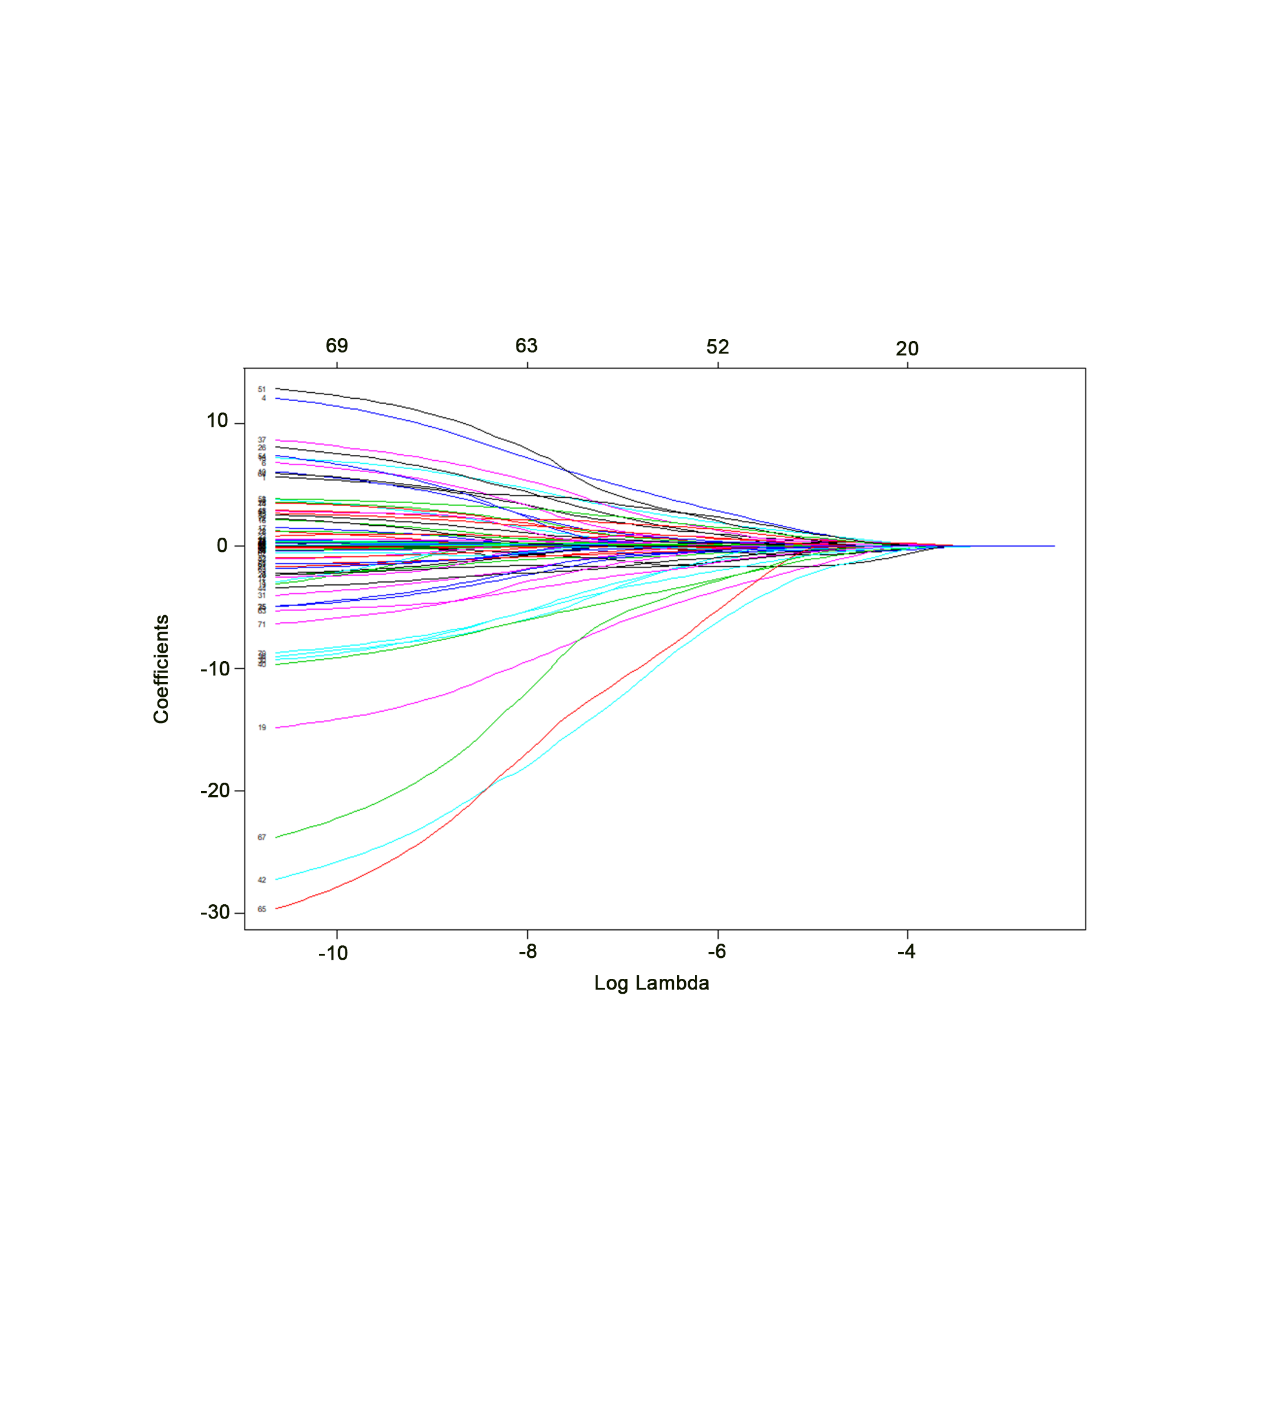


**Supplementary figure 1. LASSO coefficient profiles of the 72 clinical features.** A coefficient profile plot was produced against the log(λ) sequence. More details have been listed in supplementary table 1


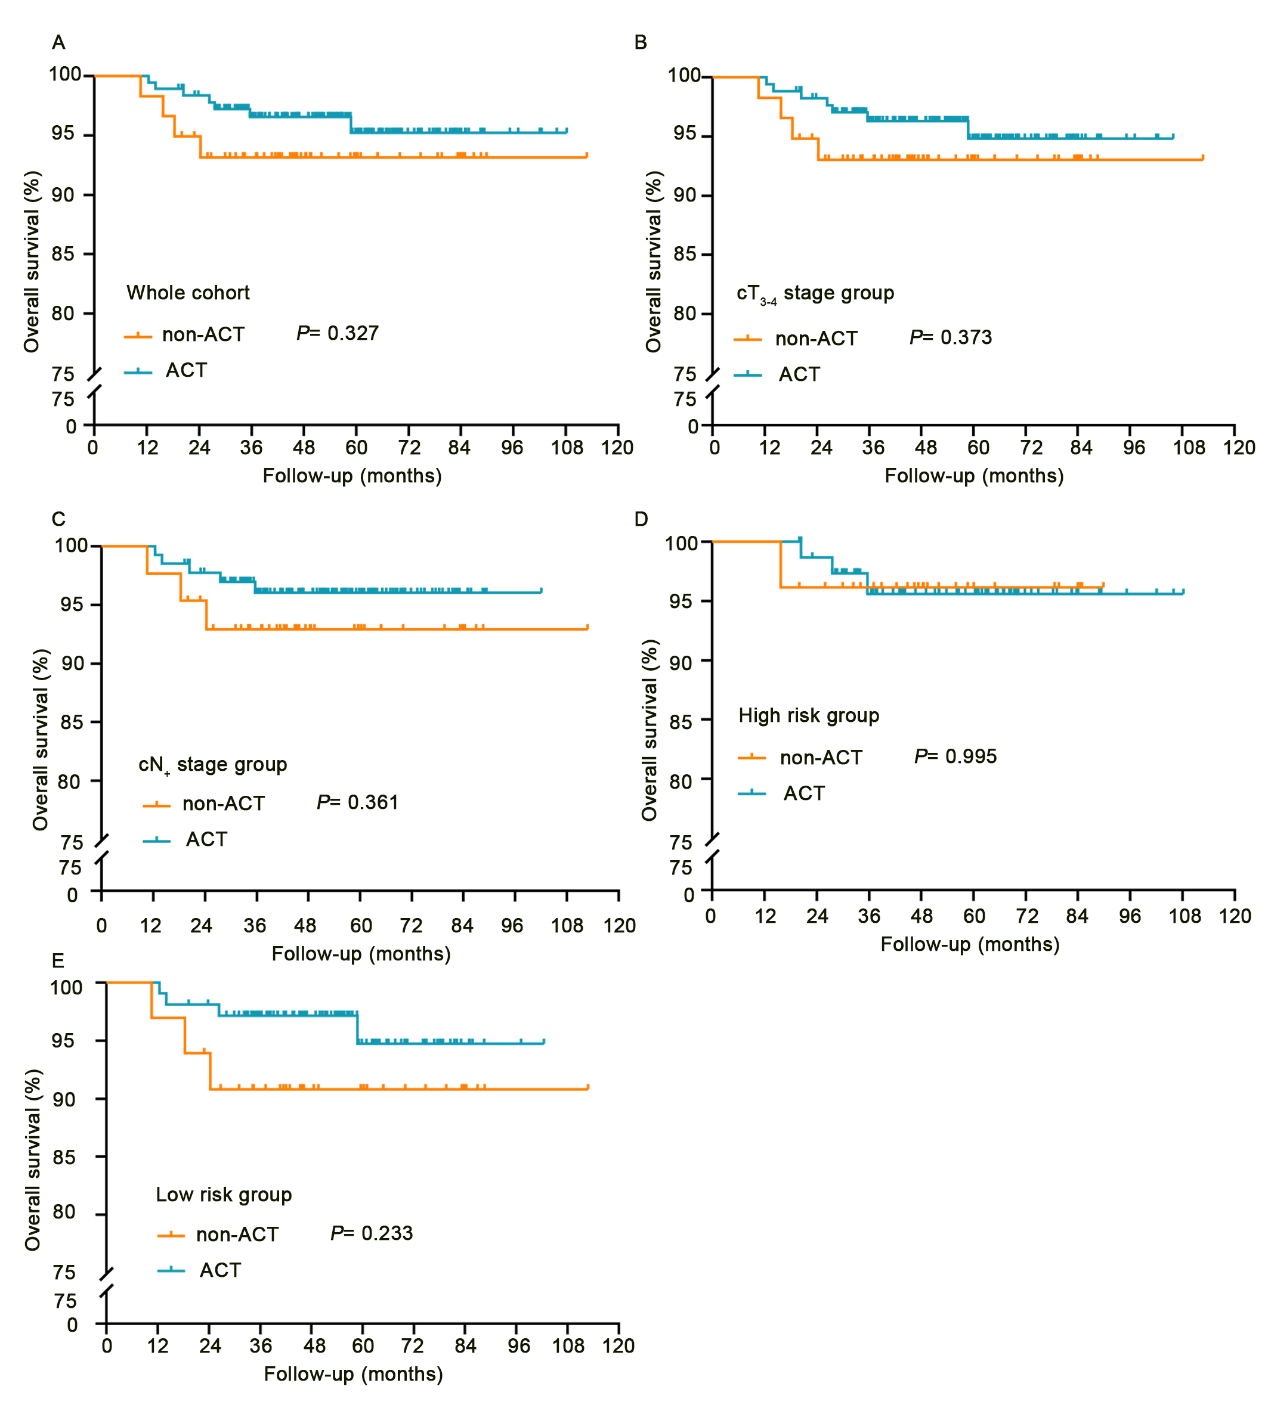


**Supplementary figure 2. The Kaplan-Meier survival curves of overall survival stratified by adjuvant chemotherapy for pCR patients.** The whole cohort (A) and different subgroups (B-E), including cT3-4 stage group (B), cN+stage group (C), high risk group (D) and low risk group (E).
